# Supplementary figures and images for: Epidemiological and Molecular Investigation of Ocular Fungal Infection in Equine from Egypt
Source: MDPI journal article supplement (doi:10.3390/vetsci7030130), 2020-09-08

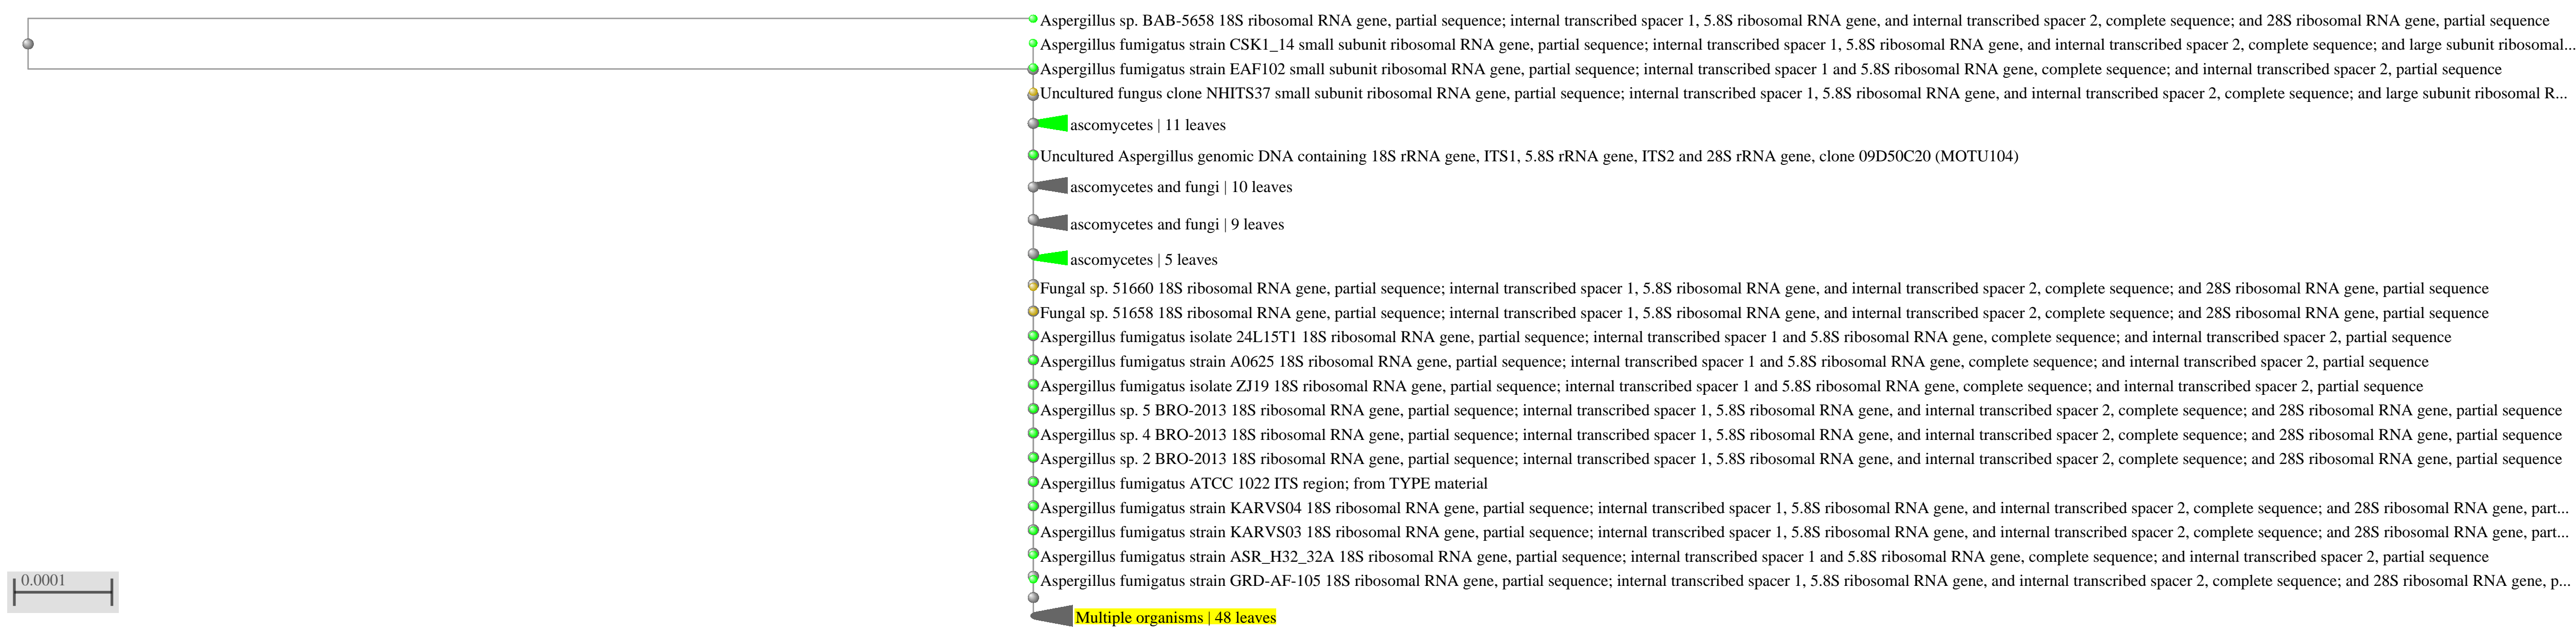

Supplement: s1 [file s1]

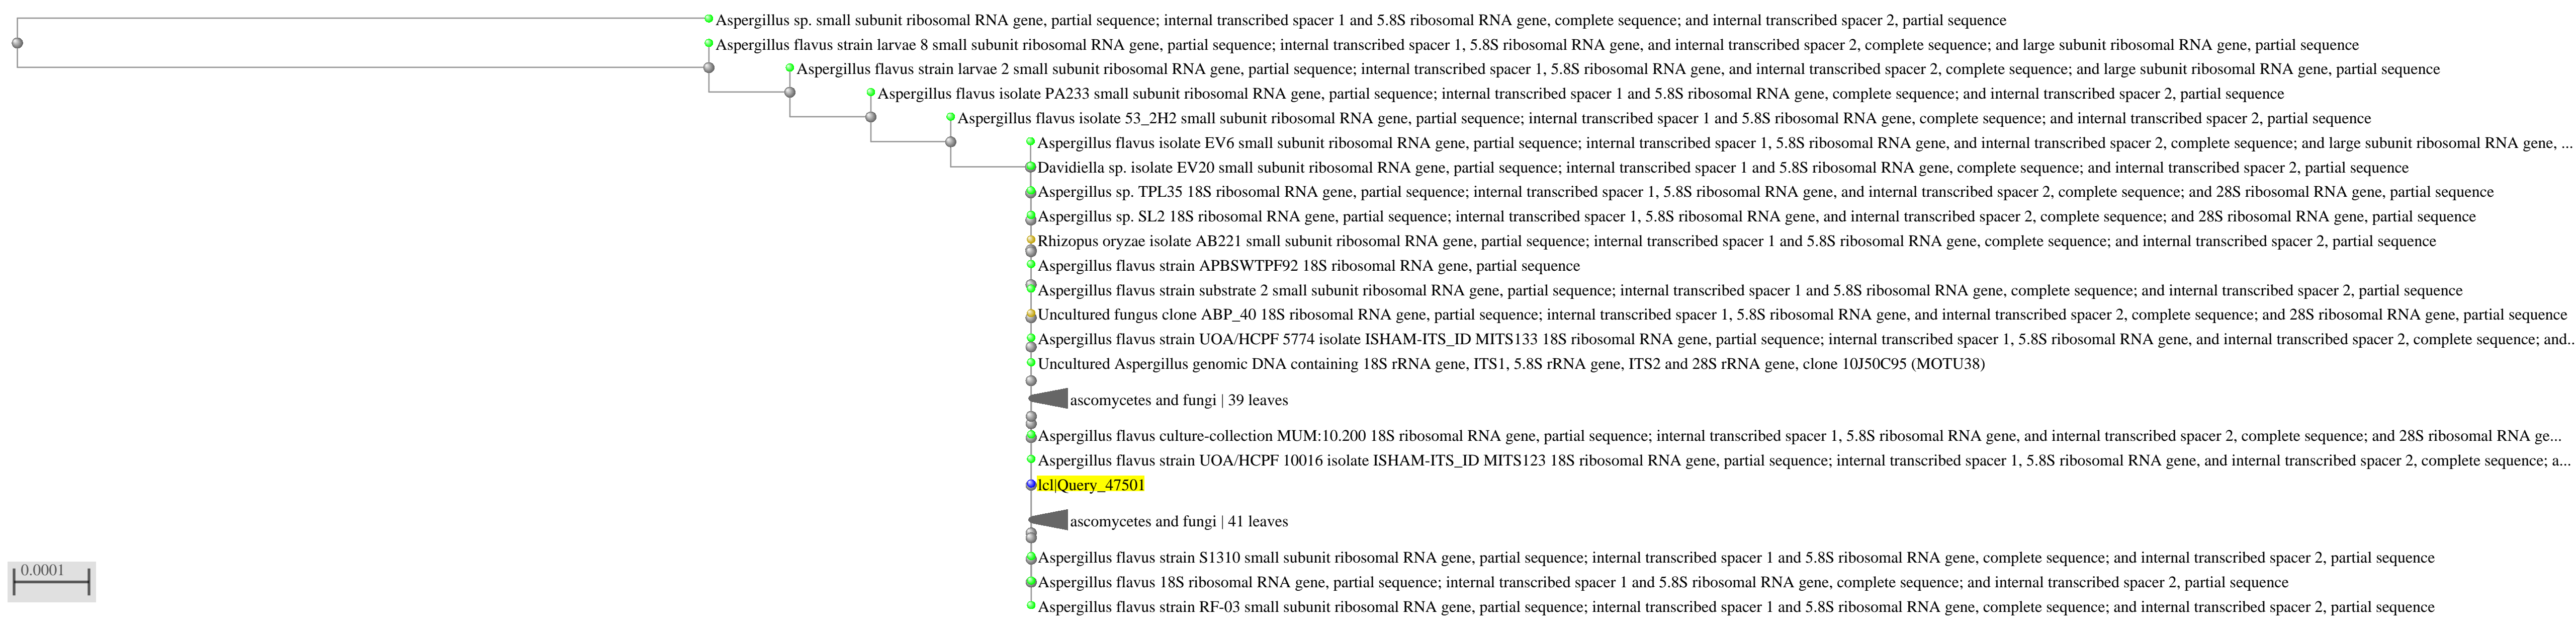

Supplement: s1 [file s1]

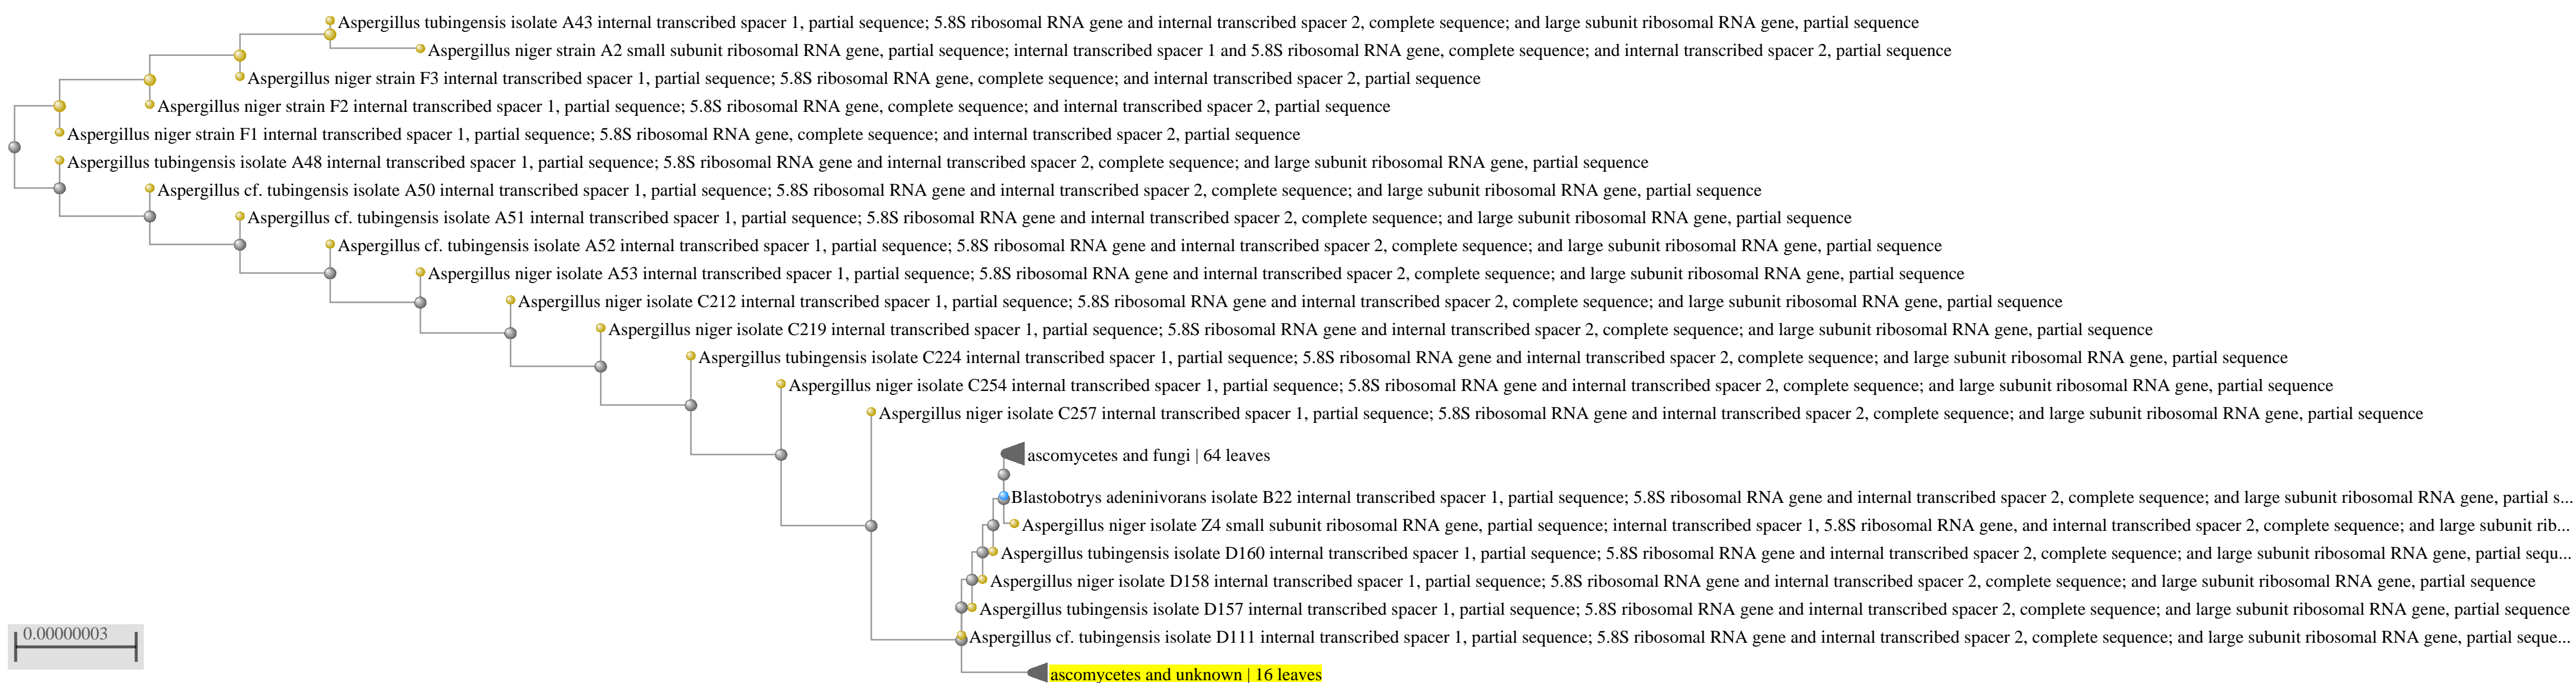

Supplement: s1 [file s1]
